# Supplementary material for: Enhancing skin delivery of tranexamic acid via esterification: synthesis and evaluation of alkyl ester derivatives
Source: Royal Society of Chemistry journal article supplement (doi:10.1039/d4ra06266c), 2024-01-01
Supplement: d4ra06266c1.pdf [file d4ra06266c1.pdf]

## Supporting Information

### Enhancing skin delivery of tranexamic acid via esterification: synthesis and evaluation of alkyl ester derivatives

Yutong Zeng<sup>a</sup>, Mengrui Ma<sup>b, c</sup>, Yongfeng Chen<sup>b</sup>, Huichao Xie<sup>a</sup>,

Pingtian Ding<sup>a, b, \*</sup>, Keda Zhang<sup>a, \*</sup>

<sup>a</sup> College of Pharmacy, Shenzhen Technology University, Shenzhen 518118, China

<sup>b</sup> School of Pharmacy, Shenyang Pharmaceutical University, Shenyang 110016, China

<sup>c</sup> Qilu Pharmaceutical Co., Ltd., Jinan 250100, China

\*Corresponding author:

Keda Zhang, Email: zhangkeda@sztu.edu.cn

Pingtian Ding, Email: dingpingtian@sztu.edu.cn

## 15 HPLC analysis

16 TA and its derivatives were quantified using a Hitachi L2000 high-performance liquid  
17 chromatography (HPLC) system (Hitachi, Tokyo, Japan), fitted with a Diamonsil® C18 column  
18 (250 mm × 4.6 mm, 5 μm; Dikma Technologies, Beijing, China). The column temperature was  
19 controlled at 30°C. A flow rate of 0.5 mL/min was maintained throughout the analysis.  
20 Detection was carried out using a UV detector set at a wavelength of 220 nm. The mobile phase  
21 compositions varied according to the sample type: for TA, the mobile phase was a mixture of  
22 20% methanol and 80% 0.01 M KH<sub>2</sub>PO<sub>4</sub> solution; for TA4, it comprised 70% methanol and  
23 30% 0.01 M KH<sub>2</sub>PO<sub>4</sub> solution; and for TA8, it consisted of 65% acetonitrile and 35% 0.01 M  
24 KH<sub>2</sub>PO<sub>4</sub> solution. Each sample had an injection volume of 20 μL.

## 25 LC-MS/MS analysis

26 Following initial sample pre-treatment, the analytes were subjected to LC-MS/MS analysis.  
27 An Agilent 1260 Infinity LC system (Agilent Technologies, Santa Clara, CA, USA) was  
28 utilized, coupled with an API 4000 triple quadrupole MS/MS system (AB Sciex, Framingham,  
29 MA, USA). A C18 analytical column (50 mm × 2.0 mm, 4 μm; Synergi 4u Hydro-RP,  
30 Phenomenex, Torrance, CA, USA) was used and protected with a C18 guard column (4 mm ×  
31 2.0 mm, 3 μm; SecurityGuard, Phenomenex, Torrance, CA, USA). A gradient elution method  
32 was employed for the mobile phase, consisting of solvent A: 5 mM ammonium acetate with  
33 0.1% formic acid, and solvent B: methanol with 0.1% formic acid. The gradient elution  
34 protocol was as follows: 0 ~ 0.6 min, 98% A; 0.6~1.0 min, 98% A to 15% A; 1.0~2.0 min, 15%  
35 A to 5% A; 2.0~3.0 min, 5% A; 3.0~3.1 min, 5% A to 98% A; 3.1~5.5 min, 98% A. The flow  
36 rate was maintained at 0.4 mL/min, the column temperature was set to 40°C, and the injection  
37 volume was 10 μL. The MS detection utilized multiple reaction monitoring (MRM) in positive  
38 ion mode, with electrospray ionization (ESI) as the ionization source. Key operational  
39 parameters were set to an ion spray voltage of 4500 V and an ion source temperature of 500°C.

40 The monitored ion pairs for quantification were: TA with m/z transitions from 158.1 to 95.2,  
41 TA4 from 214.0 to 95.2, TA8 from 270.1 to 95.2, and diphenhydramine from 256.3 to 166.9.  
42 Gas parameters included 40 psi for GS1 (nebulizer gas, nitrogen), 50 psi for GS2 (drying gas,  
43 nitrogen), 20 psi for CUR (curtain gas, nitrogen), and 12 psi for CAD (collision gas, nitrogen).  
44 Specific parameters such as declustering potentials (DP), collision energies (CE), entrance  
45 potentials (EP), and collision exit potentials (CXP) were optimized for each ion transition.

#### 46 **Water loss measurement of gels**

47 To evaluate the water loss rate in TA8 gel formulations, samples with varying propylene  
48 glycol concentrations (0%, 5%, 10%, and 15%) were prepared. Each formulation maintained a  
49 constant quantity of other excipients. Precisely 20 g of each gel sample were placed in identical  
50 glass Petri dishes. These dishes were then subjected to controlled drying conditions in an oven  
51 set at 45°C, with the Petri dish lids left open to facilitate evaporation. The dehydration process  
52 was monitored by weighing the dishes at one-hour intervals. The weight measurements at each  
53 time point enabled the calculation of the dehydration rate, providing insights into the influence  
54 of propylene glycol concentration on the water loss behavior of the gel formulations.

55

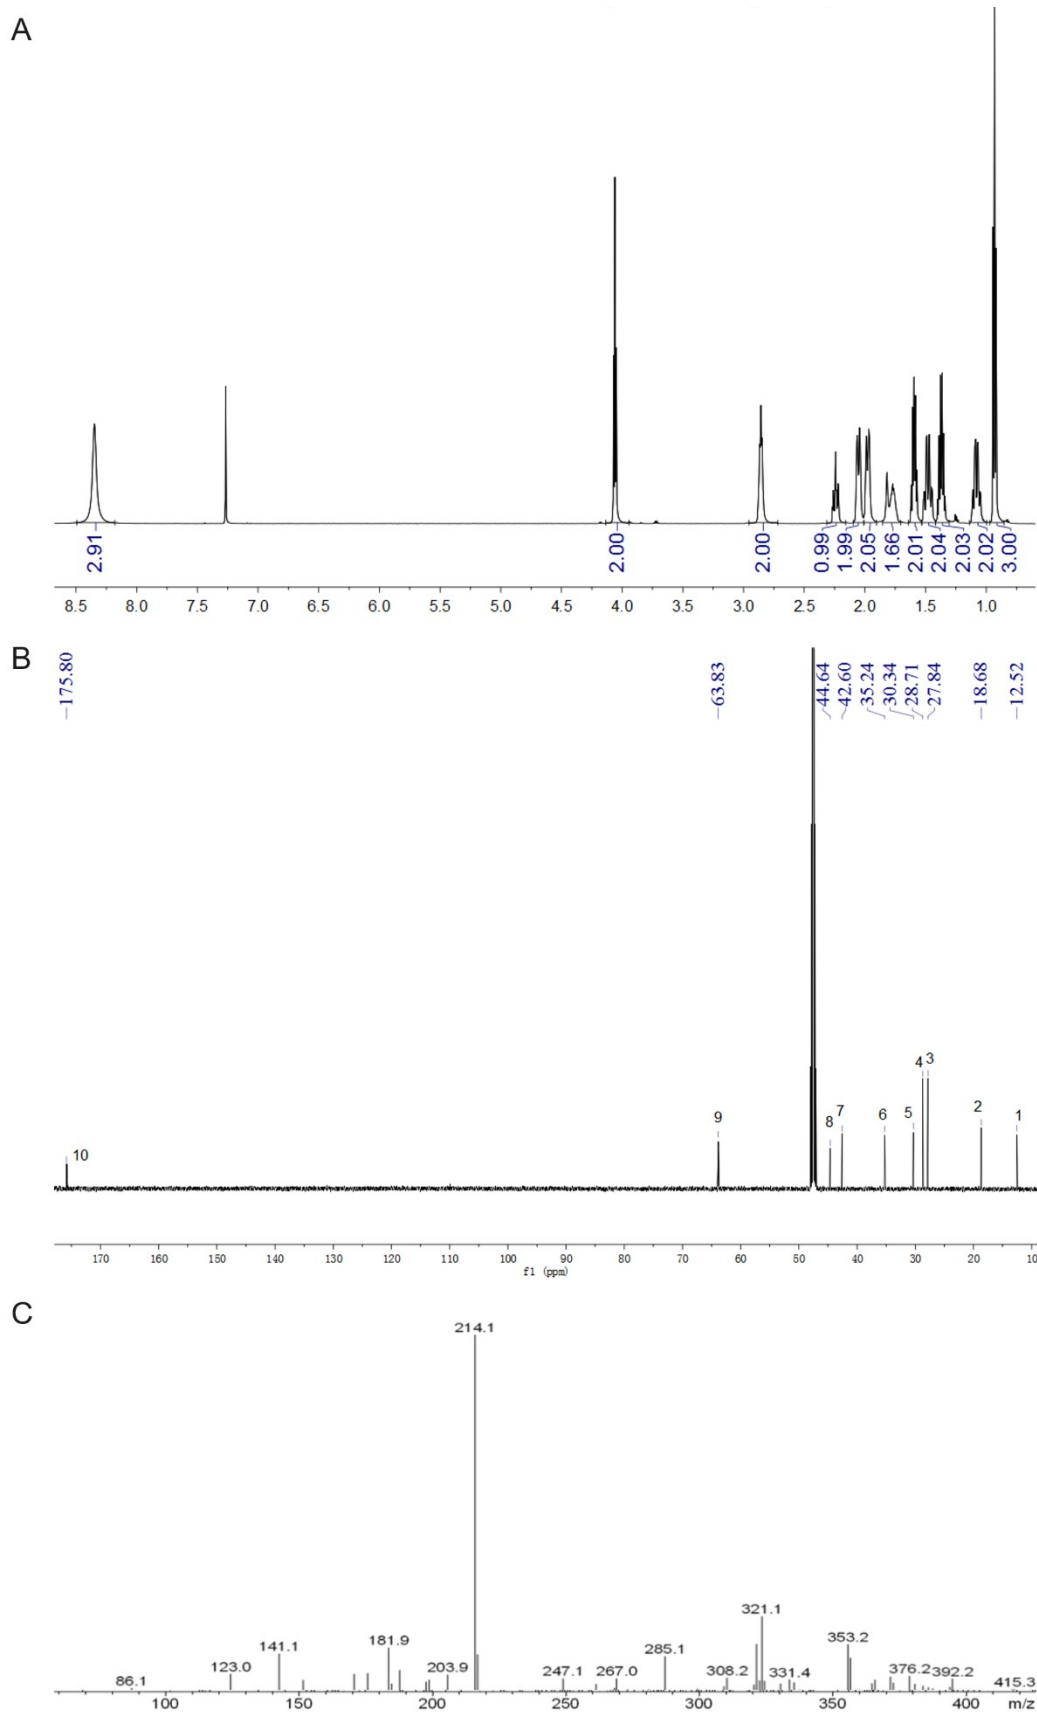

56

57 Figure S1. NMR and mass spectra of TA4. (A)  $^1\text{H}$ -NMR spectrum of TA4 in  $\text{CDCl}_3$ . (B)  $^{13}\text{C}$ -  
 58 NMR spectrum of TA4 in MeOD. (C) Mass spectrum of TA4.



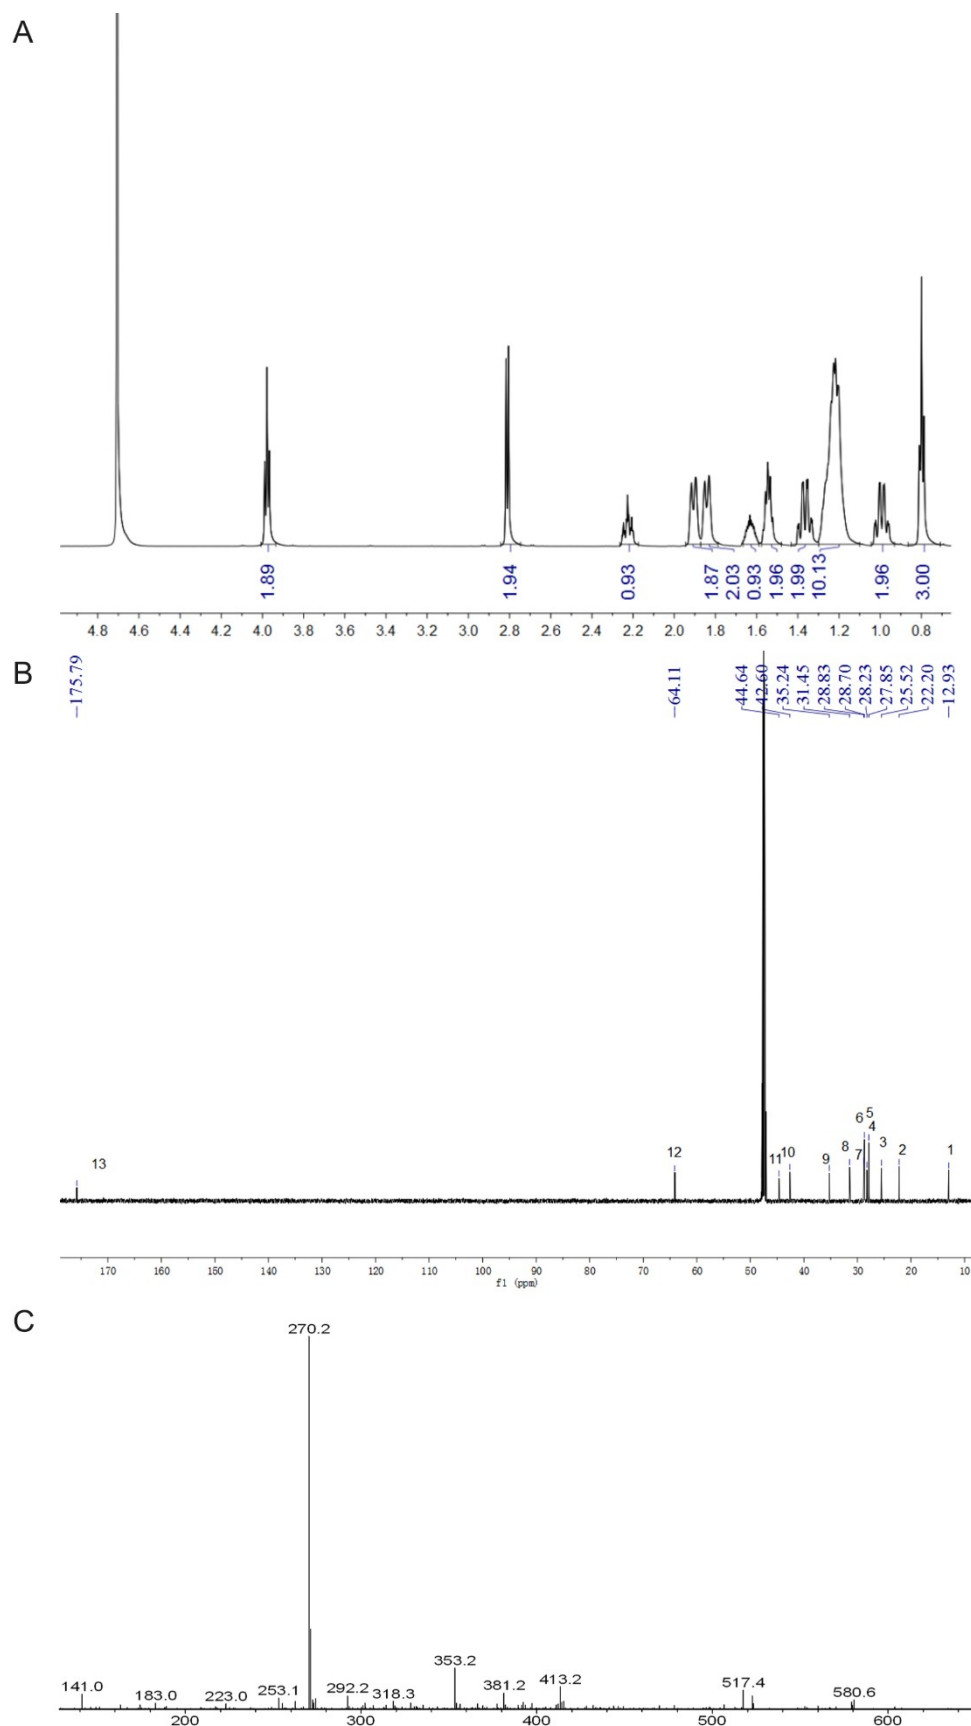

60

61 Figure S2. NMR and mass spectra of TA8: (A)  $^1\text{H}$ -NMR spectrum of TA8 in  $\text{CDCl}_3$ . (B)  $^{13}\text{C}$ -

62 NMR spectrum of TA8 in MeOD. (C) Mass spectrum of TA8.

63

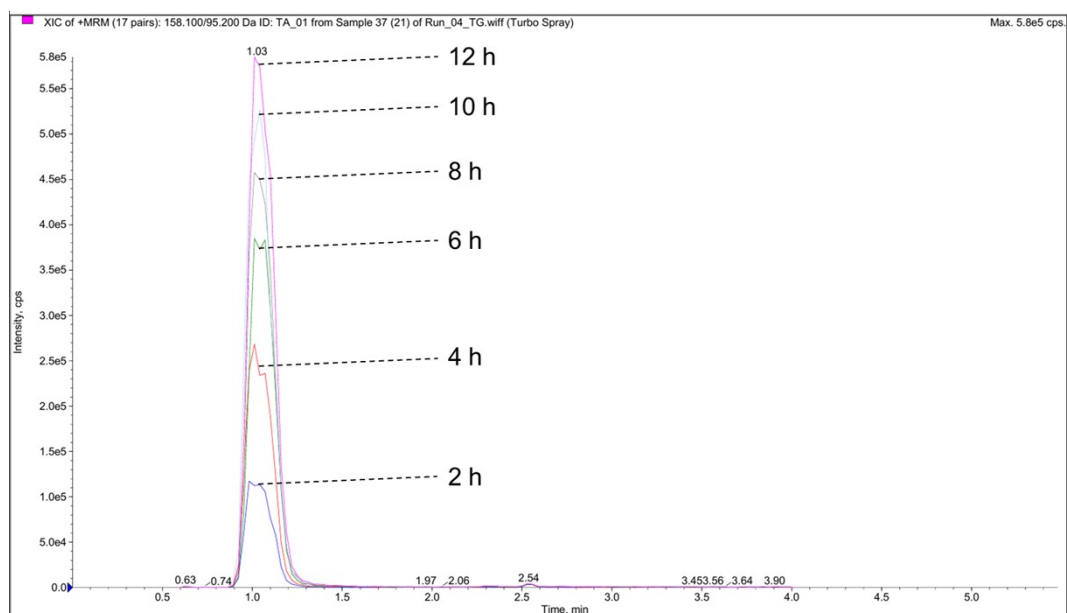

64

65 Figure S3. Representative extracted ion chromatograms (XICs) of TA ( $m/z$  158.1  $\rightarrow$  95.2) in  
66 receptor solution from the skin permeation study following TA solution application.

67

68

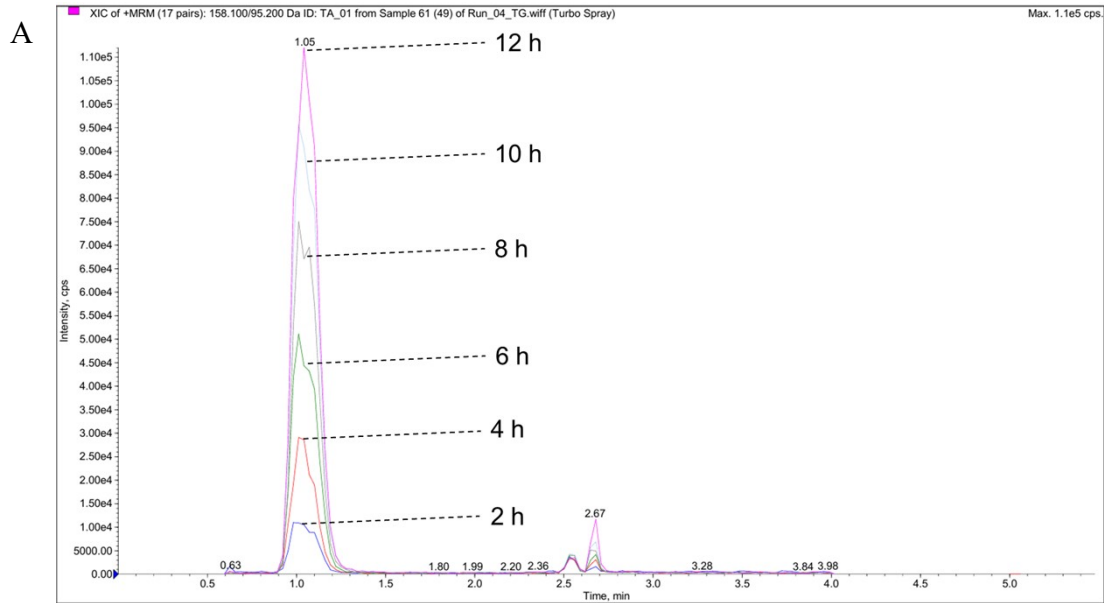

69

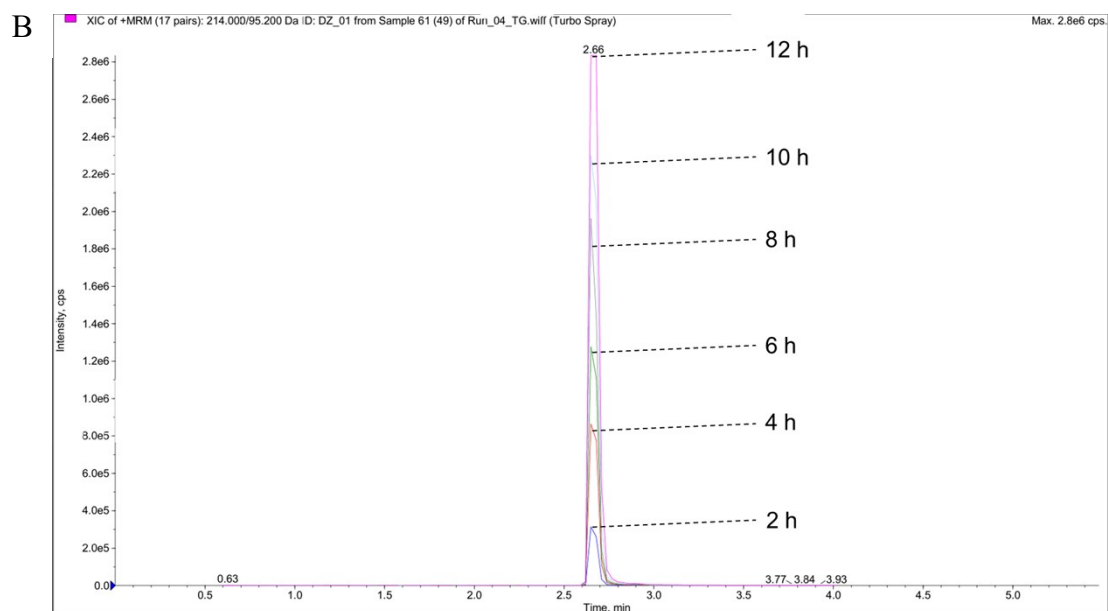

70

71

72 Figure S4. Representative extracted ion chromatograms (XICs) of (A) TA ( $m/z$  158.1  $\rightarrow$  95.2)  
 73 and (B) TA4 ( $m/z$  214.2  $\rightarrow$  95.2) in receptor solution from the skin permeation study following  
 74 TA4 solution application.



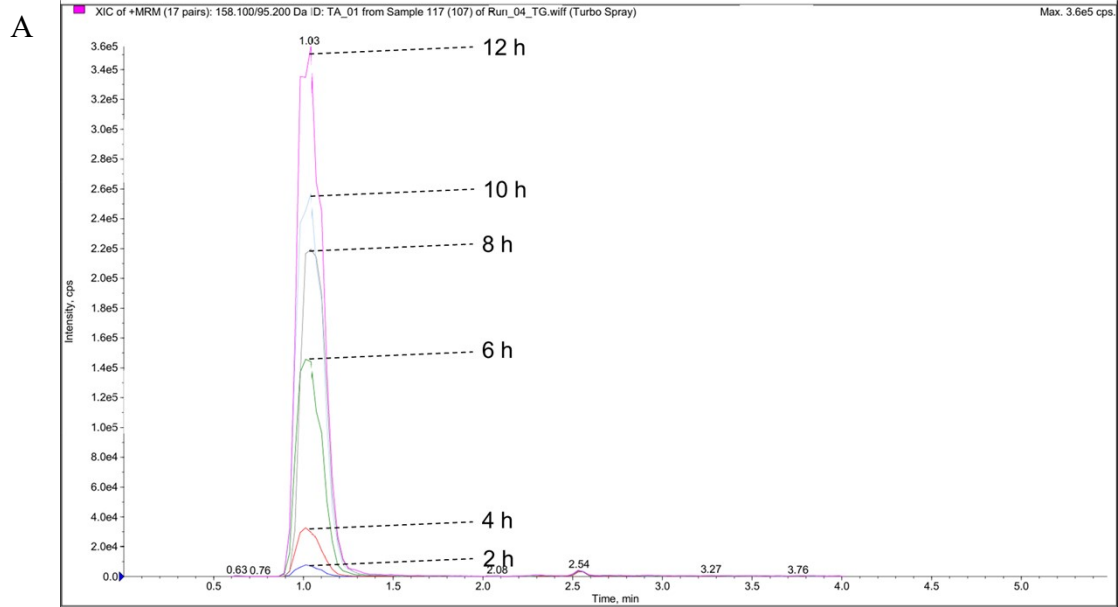

75

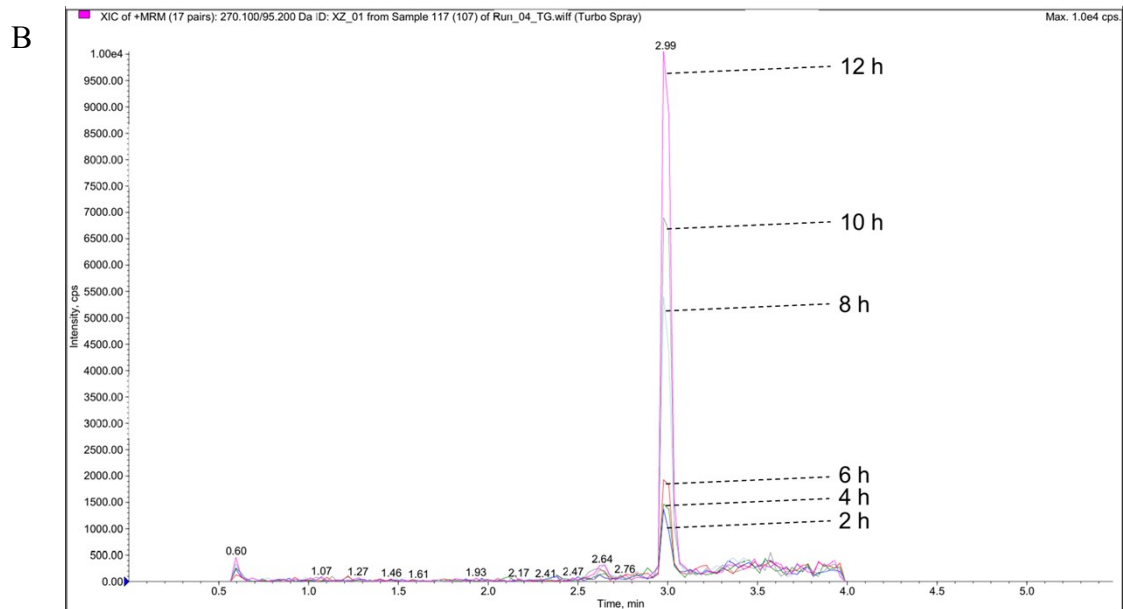

76

77 Figure S5. Representative extracted ion chromatograms (XICs) of (A) TA ( $m/z$  158.1  $\rightarrow$  95.2)  
 78 and (B) TA8 ( $m/z$  270.1  $\rightarrow$  95.2) in receptor solution from the skin permeation study following  
 79 TA8 solution application.

80

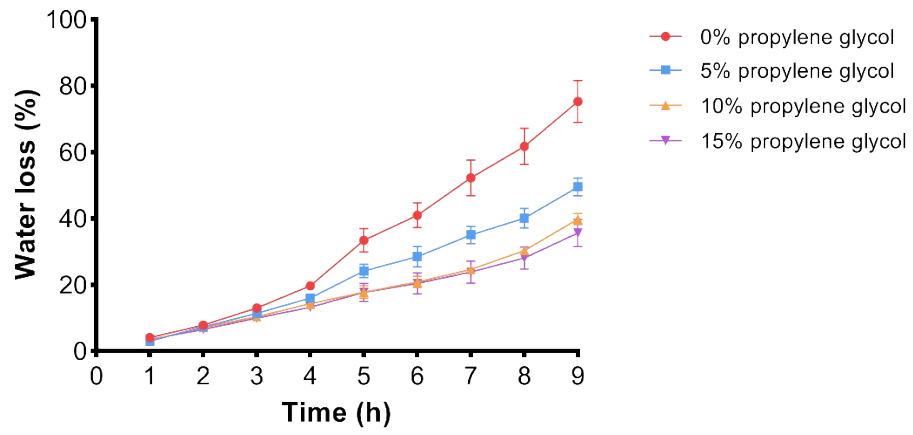

81

82 Figure S6. Water loss of TA8 gels with different concentrations of propylene glycol over time.

83

84

85 Table S1. Cumulative amounts of TA, TA4 and TA8 permeated through porcine skin over time (n = 4).

| t (h) | $Q_n$ (nmol/cm <sup>2</sup> ) |                |             |                |                |
|-------|-------------------------------|----------------|-------------|----------------|----------------|
|       | TA group                      | TA4 group      |             | TA8 group      |                |
|       | TA                            | TA4            | TA          | TA8            | TA             |
| 2     | 18.65 ± 2.04                  | 8.31 ± 0.57    | 0.00        | 15.05 ± 4.00   | 8.90 ± 1.28    |
| 4     | 37.16 ± 3.01                  | 31.95 ± 1.03   | 0.00        | 41.32 ± 4.84   | 25.49 ± 2.00   |
| 6     | 56.22 ± 0.56                  | 66.91 ± 6.79   | 0.00        | 64.41 ± 6.43   | 48.84 ± 2.49   |
| 8     | 72.66 ± 10.95                 | 105.40 ± 4.87  | 0.07 ± 0.04 | 85.01 ± 10.24  | 72.12 ± 6.98   |
| 10    | 90.70 ± 14.95                 | 140.61 ± 4.09  | 0.09 ± 0.02 | 120.61 ± 14.49 | 101.79 ± 7.46  |
| 12    | 106.37 ± 15.20                | 200.25 ± 12.53 | 0.13 ± 0.07 | 166.84 ± 2.97  | 139.74 ± 13.75 |

86
